# Supplementary material for: Mutations of two FERONIA-like receptor genes enhance rice blast resistance without growth penalty
Source: PubMed Central journal article supplement (PMC7242082; doi:10.1093/jxb/erz541), 2020-01-27
Supplement: erz541_suppl_supplementary_tables_s1-s2.pdf [file erz541_suppl_supplementary_tables_s1-s2.pdf]

**Table S1** Primers used in this study.

| Primer Name            | Primers(5'->3')                     | Source     |
|------------------------|-------------------------------------|------------|
| <b>For CRISPR/Cas9</b> |                                     |            |
| FLR3-Cas9-T1-F         | CAGTGGTCTCAGGCATATGGCATAGATCCTGTGA  | This paper |
| FLR3-Cas9-T1-R         | CAGTGGTCTCAAAACTCACAGGATCTATGCCATA  | This paper |
| FLR3-Cas9-T2-F         | CAGTGGTCTCAGGCAGCCCTCCTATCGATTGCCA  | This paper |
| FLR3-Cas9-T2-R         | CAGTGGTCTCAAAACTGGCAATCGATAGGAGGGC  | This paper |
| FLR5-Cas9-T1-F         | CAGTGGTCTCAGGCAGACAGTGCACCCATTGGA   | This paper |
| FLR5-Cas9-T1-R         | CAGTGGTCTCAAAACTCCAATGGGTGCGACTGTC  | This paper |
| FLR5-Cas9-T2-F         | CAGTGGTCTCAGGCATTCTCCCAATTAGCCCA    | This paper |
| FLR5-Cas9-T2-R         | CAGTGGTCTCAAAACTGGGCTAATTGGGAAGGAA  | This paper |
| FLR7-Cas9-T1-F         | CAGTGGTCTCAGGCAGGAGGATCCTGGCTTGTGG  | This paper |
| FLR7-Cas9-T1-R         | CAGTGGTCTCAAAACCCACAAGCCAGGATCCTCC  | This paper |
| FLR7-Cas9-T2-F         | CAGTGGTCTCAGGCATAGAGCCTCAAAGGCGCCG  | This paper |
| FLR7-Cas9-T2-R         | CAGTGGTCTCAAAACCGGCGCCTTTGAGGCTCTA  | This paper |
| FLR8-Cas9-T1-F         | CAGTGGTCTCAGGCATAACTTCAGCGTGCTGCCG  | This paper |
| FLR8-Cas9-T1-R         | CAGTGGTCTCAAAACCGGCAGCACGCTGAAGTTA  | This paper |
| FLR8-Cas9-T2-F         | CAGTGGTCTCAGGCACACATTCGGGAATTCAGT   | This paper |
| FLR8-Cas9-T2-R         | CAGTGGTCTCAAAACACTGAAATTCCTGAATGTG  | This paper |
| FLR9-Cas9-T1-F         | CAGTGGTCTCAGGCACGCGGCGAGCCCTGAGC    | This paper |
| FLR9-Cas9-T1-R         | CAGTGGTCTCAAAACGCTCAAGGGCTCCGCCGCG  | This paper |
| FLR9-Cas9-T2-F         | CAGTGGTCTCAGGCATGTCTGTGATGAGCTCGTC  | This paper |
| FLR9-Cas9-T2-R         | CAGTGGTCTCAAAACGACGAGCTCATCACAGACA  | This paper |
| FLR10-Cas9-T1-F        | CAGTGGTCTCAGGCATGAGGAGGATGGAGAACAA  | This paper |
| FLR10-Cas9-T1-R        | CAGTGGTCTCAAAACTTGTCTCCATCCTCCTCA   | This paper |
| FLR10-Cas9-T2-F        | CAGTGGTCTCAGGCAGACGAATCCAATGGTGACC  | This paper |
| FLR10-Cas9-T2-R        | CAGTGGTCTCAAAACGGTCACCATTTGGATTGTC  | This paper |
| FLR11-Cas9-T1-F        | CAGTGGTCTCAGGCAACTTCCACAGAAGCTCCTG  | This paper |
| FLR11-Cas9-T1-R        | CAGTGGTCTCAAAACCAGGAGCTTCTGTGGAAGT  | This paper |
| FLR11-Cas9-T2-F        | CAGTGGTCTCAGGCAGACGCTGAACCGCGCCGAG  | This paper |
| FLR11-Cas9-T2-R        | CAGTGGTCTCAAAACCTCGGCGCGGTTACGCGTC  | This paper |
| FLR12-Cas9-T1-F        | CAGTGGTCTCAGGCAAGATGGGACAACGACCGGA  | This paper |
| FLR12-Cas9-T1-R        | CAGTGGTCTCAAAACTCCGGTCGTTGTCCCATCT  | This paper |
| FLR12-Cas9-T2-F        | CAGTGGTCTCAGGCAGGGAAGGACGAGTGCGATG  | This paper |
| FLR12-Cas9-T2-R        | CAGTGGTCTCAAAACCCATCGCACTCGTCCTTCCC | This paper |
| FLR13-Cas9-T1-F        | CAGTGGTCTCAGGCAGGAAGAGGTAGCTGTCCGC  | This paper |
| FLR13-Cas9-T1-R        | CAGTGGTCTCAAAACGCGGACAGCTACCTCTTCC  | This paper |
| FLR13-Cas9-T2-F        | CAGTGGTCTCAGGCACCGGAAGGGGAAGAAGCGG  | This paper |
| FLR13-Cas9-T2-R        | CAGTGGTCTCAAAACCCGCTTCTTCCCCTCCGG   | This paper |
| FLR14-Cas9-T1-F        | CAGTGGTCTCAGGCATCCGGAACGAGTAGGACGA  | This paper |
| FLR14-Cas9-T1-R        | CAGTGGTCTCAAAACTCGTCTACTCGTTCCGGA   | This paper |
| FLR14-Cas9-T2-F        | CAGTGGTCTCAGGCACGAGTCAGCAGCGCCGATG  | This paper |

|                                     |                                           |            |
|-------------------------------------|-------------------------------------------|------------|
| FLR14-Cas9-T2-R                     | CAGTGGTCTCAAACCATCGGGCGCTGCTGACTCG        | This paper |
| FLR15-Cas9-T1-F                     | CAGTGGTCTCAGGCAACCCTATGCAGCAGTACAG        | This paper |
| FLR15-Cas9-T1-R                     | CAGTGGTCTCAAACCTGTACTGCTGCATAGGGT         | This paper |
| FLR15-Cas9-T2-F                     | CAGTGGTCTCAGGCATCATAGCTCTGGTAGGCAA        | This paper |
| FLR15-Cas9-T2-R                     | CAGTGGTCTCAAACCTTGCCTACCAGAGCTATGA        | This paper |
| FLR16-Cas9-T1-F                     | CAGTGGTCTCAGGCAGATGGAATTGCTTGGCTGA        | This paper |
| FLR16-Cas9-T1-R                     | CAGTGGTCTCAAACCTCAGCCAAGCAATTCCATC        | This paper |
| FLR16-Cas9-T2-F                     | CAGTGGTCTCAGGCAACATTCCACAGGATCAATG        | This paper |
| FLR16-Cas9-T2-R                     | CAGTGGTCTCAAACCATTTGATCCTGTGGAATGT        | This paper |
| <b>Identification of homozygous</b> |                                           |            |
| FLR3-Cas9-CK-F                      | TGCAAGTGTCCCAACTCTTATAG                   | This paper |
| FLR3-Cas9-CK-R                      | ACATTACCATCTTTGGAGAAGGT                   | This paper |
| FLR5-Cas9-CK-F                      | TCGTTCCCACCTATCTTATAGCA                   | This paper |
| FLR5-Cas9-CK-R                      | GAATTCTCGAAGGATGTAGGC                     | This paper |
| FLR7-Cas9-CK-F                      | CTCCAGTAACTTGGAGATTGAG                    | This paper |
| FLR7-Cas9-CK-R                      | ACGTCATAGTTCTCAGCAGC                      | This paper |
| FLR8-Cas9-CK-F                      | CTTAAGCAGCCCCTGGAATAGC                    | This paper |
| FLR8-Cas9-CK-R                      | GTGAGCATCACCTCAATTGCAT                    | This paper |
| FLR9-Cas9-CK-F                      | GCACCGACACGTCTTCAC                        | This paper |
| FLR9-Cas9-CK-R                      | AGAACTCCGACTTCGACCTCAC                    | This paper |
| FLR10-Cas9-CK-F                     | GTTTCGTCCCTGCATCTTCTGCTC                  | This paper |
| FLR10-Cas9-CK-R                     | TAAGGCTTGGAGGGGCTGAAAC                    | This paper |
| FLR11-Cas9-CK-F                     | GAGCTGTCCGGGAAGTCCG                       | This paper |
| FLR11-Cas9-CK-R                     | CATGTCACGTTTCGACGTGGTC                    | This paper |
| FLR12-Cas9-CK-F                     | GCAAAGGGATAGCAAAGCT                       | This paper |
| FLR12-Cas9-CK-R                     | GTAACGGGAGGAGGAGGAG                       | This paper |
| FLR13-Cas9-CK-F                     | TGGGGCAACCTACTCTGATCAGC                   | This paper |
| FLR13-Cas9-CK-R                     | CACCTCGATGGCGTTGACGAAC                    | This paper |
| FLR14-Cas9-CK-F                     | ACAACCTACCTCATCAGCTGC                     | This paper |
| FLR14-Cas9-CK-R                     | CTGGTCACTAGTCCATTCTCG                     | This paper |
| FLR15-Cas9-CK-F                     | GACAACTACCTGGTGGACTG                      | This paper |
| FLR15-Cas9-CK-R                     | GCGGTGTTGATCCTCCAC                        | This paper |
| FLR16-Cas9-CK-F                     | CAAACCGCAAGGATATCACT                      | This paper |
| FLR16-Cas9-CK-R                     | CGCAGTATTGTAGACACTGTCTG                   | This paper |
| FLR4-LP                             | TCTTGAGGCGTTGCTTCCAT                      | This paper |
| FLR4-RP                             | TGGGGTCACCTCAGCAAAG                       | This paper |
| T-DNA-BP                            | CCACAGTTTTTCGCGATCCAGACTG                 | This paper |
| <b>Overexpression</b>               |                                           |            |
| FLR2-1300GFP-F                      | CGGTACCCGGGGATCCATGGGAAGCTCCAGATTCGTGCTCT | This paper |
| FLR2-1300GFP-R                      | CCATGTCGACTCTAGACCGTCCCTTGGGGTTCATGATCTGT | This paper |
| <b>qRT-PCR for gene expression</b>  |                                           |            |
| FLR1-RT-F                           | GGAAGATGACACGCCATACATAACC                 | This paper |
| FLR1-RT-R                           | GGAGCCTCACGAGATACTGATAACC                 | This paper |

|                 |                           |                            |
|-----------------|---------------------------|----------------------------|
| FLR2-RT-F       | TATCCAGATGTCCAGGCTAAAC    | This paper                 |
| FLR2-RT-R       | CAAGAACCACCAGACCTCCAAT    | This paper                 |
| FLR3-RT-F       | CTGAATTGTGGAGCCTCTGGTG    | This paper                 |
| FLR3-RT-R       | GGAGCGAAGGGTCTTGGTATGA    | This paper                 |
| FLR4-RT-F       | TATGCTTATCGCTTGTTTTTCT    | This paper                 |
| FLR4-RT-R       | TTTCGCCATTATTGTCTATTC     | This paper                 |
| FLR5-RT-F       | AAAGCATTCTGGCAAGACTGAC    | This paper                 |
| FLR5-RT-R       | CCACCGTTGTACCATTATCTATCTC | This paper                 |
| FLR6-RT-F       | AGATCGCACCTGACTGCCTGAA    | This paper                 |
| FLR6-RT-R       | CGCCGTTCCAAATGTCTCCTG     | This paper                 |
| FLR7-RT-F       | ACTTGGTCCGGTTGCATTC       | This paper                 |
| FLR7-RT-R       | ACTTGGTCCGGTTGCATTC       | This paper                 |
| FLR8-RT-F       | TGAGGGTACTACAGTGGCAATC    | This paper                 |
| FLR8-RT-R       | TGGGAGGTCACTTCCATAAAG     | This paper                 |
| FLR9-RT-F       | GACAAGCTGAGCATCCAGGT      | This paper                 |
| FLR9-RT-R       | CTTGTACCACTTGACGGCCA      | This paper                 |
| FLR10-RT-F      | CTACTCAACCGCACAAACAGAT    | This paper                 |
| FLR10-RT-R      | GACAAGTCGAGGTTAAGGACAC    | This paper                 |
| FLR11-RT-F      | AGCCGTACAGGTGGCTCCTCAGGGT | This paper                 |
| FLR11-RT-R      | GGGGACTTCGACGACGCAAACATC  | This paper                 |
| FLR12-RT-F      | GCCTCCATTTCTTCCCTTTAC     | This paper                 |
| FLR12-RT-R      | GGGCGTCTCCACAGCAGCTCCG    | This paper                 |
| FLR13-RT-F      | AGCAGAGGCTGGAGGCGTGCAT    | This paper                 |
| FLR13-RT-R      | GGTGCTGACGTGCGTCTTGTC     | This paper                 |
| FLR14-RT-F      | CAGCTCAACCCTGCCGTGATG     | This paper                 |
| FLR14-RT-R      | CGGTGTTCGATTGTAAGAAAC     | This paper                 |
| FLR15-RT-F      | ATGGATACCGATTTGCCTTTAGC   | This paper                 |
| FLR15-RT-R      | TGTACGGAACCTCATTGAGACCTTG | This paper                 |
| FLR16-RT-F      | TGATAATTTCCCTCAGCCAAGC    | This paper                 |
| FLR16-RT-R      | CCAAGATACTGCCCAACACCCA    | This paper                 |
| OsActin-RT-F    | TGTATGCCAGTGGTCGTACCA     | Yin <i>et al.</i> , 2018   |
| OsActin-RT-R    | CCAGCAAGGTCGAGACGAA       | Yin <i>et al.</i> , 2018   |
| OsPR1a-RT-F     | GGAAGTACGGCGAGAACATC      | Yin <i>et al.</i> , 2018   |
| OsPR1a-RT-R     | TGGTCGTACCACTGCTTCTC      | Yin <i>et al.</i> , 2018   |
| OsPR4-RT-F      | AGTATGGATGGACCGCCTTCTGT   | Yin <i>et al.</i> , 2018   |
| OsPR4-RT-R      | CTCGCAATTATTGTCGCACCTGTTC | Yin <i>et al.</i> , 2018   |
| Os04g10010-RT-F | AAATGATTTGGGACCAGTCG      | Li <i>et al.</i> , 2018    |
| Os04g10010-RT-R | GATGGAATGTCTCGCAAAC       | Li <i>et al.</i> , 2018    |
| OsNAC4-RT-F     | TCCTGCCACCATTCTGAGATG     | Li <i>et al.</i> , 2018    |
| OsNAC4-RT-R     | TTGCAGAATCATGCTTGCCAG     | Li <i>et al.</i> , 2018    |
| OsKS4-RT-F      | TCGCATTGCGTGTGCAA         | Li <i>et al.</i> , 2018    |
| OsKS4-RT-R      | TTGGAACTTCGACATCGAAA      | Li <i>et al.</i> , 2018    |
| OsWRKY45-RT-F   | CGGGTAAAACGATCGAAAGA      | Jiang <i>et al.</i> , 2010 |

|                                                                       |                         |                            |
|-----------------------------------------------------------------------|-------------------------|----------------------------|
| OsWRKY45-RT-R                                                         | GCTGAGACGACACATCAACAA   | Jiang <i>et al.</i> , 2010 |
| <b>qRT-PCR of rice gene for quantifying <i>Magnaporthe oryzae</i></b> |                         |                            |
| MoPot2-RT-F                                                           | ACGACCCGTCTTACTTATTTGG  | Li <i>et al.</i> , 2017    |
| MoPot2-RT-R                                                           | AAGTAGCGTTGGTTTTGTTGGAT | Li <i>et al.</i> , 2017    |
| OsUbi-RT-F                                                            | TTCTGGTCCTTCCACTTTTCAG  | Li <i>et al.</i> , 2017    |
| OsUbi-RT-R                                                            | ACGATTGATTAACCAGTCCATGA | Li <i>et al.</i> , 2017    |

- Jiang CJ, Shimono M, Sugano S, Kojima M, Yazawa K, Yoshida R, Inoue H, Hayashi N, Sakakibara H, Takatsuji H.** 2010. Abscisic acid interacts antagonistically with salicylic acid signaling pathway in rice-*Magnaporthe grisea* interaction. *Molecular Plant-Microbe Interactions* **23**, 791-798.
- Li W, Zhu Z, Chern M, et al.** 2017. A Natural Allele of a Transcription Factor in Rice Confers Broad-Spectrum Blast Resistance. *Cell* **170**, 114-126.e115.
- Li Y, Zhang Y, Wang QX, et al.** 2018. RESISTANCE TO POWDERY MILDEW8.1 boosts pattern-triggered immunity against multiple pathogens in Arabidopsis and rice. *Plant Biotechnology Journal* **16**, 428-441.
- Yin X, Zou B, Hong X, et al.** 2018. Rice copine genes OsBON1 and OsBON3 function as suppressors of broad-spectrum disease resistance. *Plant Biotechnology Journal* **16**, 1476-1487.

**Table S2** Members of FLR gene family.

| Name  | MSU_ID         | Indica ortholog | Wild rice ortholog | Arabidopsis ortholog                                     | Cellular function in rice                                                                                                                                                                                                                                                                   |
|-------|----------------|-----------------|--------------------|----------------------------------------------------------|---------------------------------------------------------------------------------------------------------------------------------------------------------------------------------------------------------------------------------------------------------------------------------------------|
| FLR1  | LOC_Os03g21540 | BGIOSGA012562   | ORUF103G16840      | AT3G51550 FER                                            | FLR1 (DRUS1) and FLR2 (DRUS2) redundantly controlled rice height, tillering, branching, inflorescence, spikelet development, seed setting, floral organs and sugar utilization / conversion varying degrees (Li <i>et al.</i> , 2016; Pu <i>et al.</i> , 2017; Yang <i>et al.</i> , 2015).. |
| FLR2  | LOC_Os01g56330 | BGIOSGA004527   | ORUF101G35600      | AT3G51550 FER                                            |                                                                                                                                                                                                                                                                                             |
| FLR3  | LOC_Os05g25450 | BGIOSGA018309   | ORUF105G12470      |                                                          |                                                                                                                                                                                                                                                                                             |
| FLR4  | LOC_Os05g25370 | BGIOSGA019611   | ORUF105G12370      |                                                          |                                                                                                                                                                                                                                                                                             |
| FLR5  | LOC_Os05g25350 |                 | ORUF105G12350      |                                                          |                                                                                                                                                                                                                                                                                             |
| FLR6  | LOC_Os05g20150 | BGIOSGA018383   | ORUF105G10720      | AT3G04690 ANX1,<br>AT5G28680 ANX2                        |                                                                                                                                                                                                                                                                                             |
| FLR7  | LOC_Os07g05370 | BGIOSGA024825   | ORUF107G02770      | AT1G30570 HERK2                                          |                                                                                                                                                                                                                                                                                             |
| FLR8  | LOC_Os04g52860 | BGIOSGA014330   | ORUF104G27210      | AT1G30570 HERK2                                          |                                                                                                                                                                                                                                                                                             |
| FLR9  | LOC_Os06g03610 | BGIOSGA022025   | ORUF106G01500      | AT4G39110 BUP1,<br>AT2G21480 BUP2,<br>AT5G61350 EUR/CAP1 | Pollen tube growth and integrity (Liu <i>et al.</i> , 2016).                                                                                                                                                                                                                                |
| FLR10 | LOC_Os03g55210 | BGIOSGA009777   | ORUF103G36350      | AT4G39110 BUP1,<br>AT2G21480 BUP2,<br>AT5G61350 EUR/CAP1 |                                                                                                                                                                                                                                                                                             |
| FLR11 | LOC_Os10g39010 | BGIOSGA031496   | ORUF110G17890      | AT2G23200, AT5G24010                                     |                                                                                                                                                                                                                                                                                             |
| FLR12 | LOC_Os03g03280 | BGIOSGA011750   | ORUF103G01640      | AT2G23200, AT5G24010                                     |                                                                                                                                                                                                                                                                                             |
| FLR13 | LOC_Os03g17300 | BGIOSGA012357   | ORUF103G13450      | AT2G39360 CVY1,<br>AT5G59700, AT3G46290<br>HERK1         |                                                                                                                                                                                                                                                                                             |
| FLR14 | LOC_Os01g06280 | BGIOSGA002819   | ORUF101G03770      | AT2G39360 CVY1,<br>AT5G59700, AT3G46290<br>HERK1         |                                                                                                                                                                                                                                                                                             |
| FLR15 | LOC_Os06g22810 | BGIOSGA022831   | ORUF106G14270      | AT2G39360 CVY1,<br>AT5G59700, AT3G46290<br>HERK1         |                                                                                                                                                                                                                                                                                             |
| FLR16 | LOC_Os05g06990 | BGIOSGA019236   | ORUF105G04540      | AT2G39360 CVY1,<br>AT5G59700, AT3G46290<br>HERK1         |                                                                                                                                                                                                                                                                                             |

**Li C, Wang L, Cui Y, *et al.* 2016.** Two FERONIA-like receptor (FLR) genes are required to maintain architecture, fertility, and seed yield in rice. *Molecular Breeding* **36**, 151.

**Liu L, Zheng C, Kuang B, Wei L, Yan L, Wang T. 2016.** Receptor-Like Kinase RUPO Interacts with Potassium Transporters to Regulate Pollen Tube Growth and Integrity in Rice. *PLoS Genetics* **12**, e1006085.

**Pu CX, Han YF, Zhu S, *et al.* 2017.** The Rice Receptor-Like Kinases DWARF AND RUNTISH SPIKELET1 and

2 Repress Cell Death and Affect Sugar Utilization during Reproductive Development. *The Plant Cell* **29**, 70-89.

**Yang T, Wang L, Li C, Liu Y, Zhu S, Qi Y, Liu X, Lin Q, Luan S, Yu F.** 2015. Receptor protein kinase FERONIA controls leaf starch accumulation by interacting with glyceraldehyde-3-phosphate dehydrogenase. *Biochemical and Biophysical Research Communications* **465**, 77-82.
